# Supplementary material for: Synthesis and Characterization of Novel Wholly Aromatic Copolyesters Based on 4′-Hydroxybiphenyl-3-Carboxylic and 3-Hydroxybenzoic Acids
Source: MDPI journal article supplement (doi:10.3390/polym15092133), 2023-04-29
Supplement: s1 [file s1]

Article

# Synthesis and Characterization of Novel Wholly Aromatic Copolyesters Based on 4'-Hydroxybiphenyl-3-carboxylic and 3-Hydroxybenzoic Acids

Pavel A. Mikhailov \*, Kirill V. Zuev \* and Valery G. Kulichikhin

A. V. Topchiev Institute of Petrochemical Synthesis, Russian Academy of Sciences (TIPS RAS),  
29 Leninsky Prospekt, 119991 Moscow, Russia; klch@ips.ac.ru

\* Correspondence: pmih@ips.ac.ru (P.A.M.); zuev.kirill@inbox.ru (K.V.Z.)

## Supplementary materials

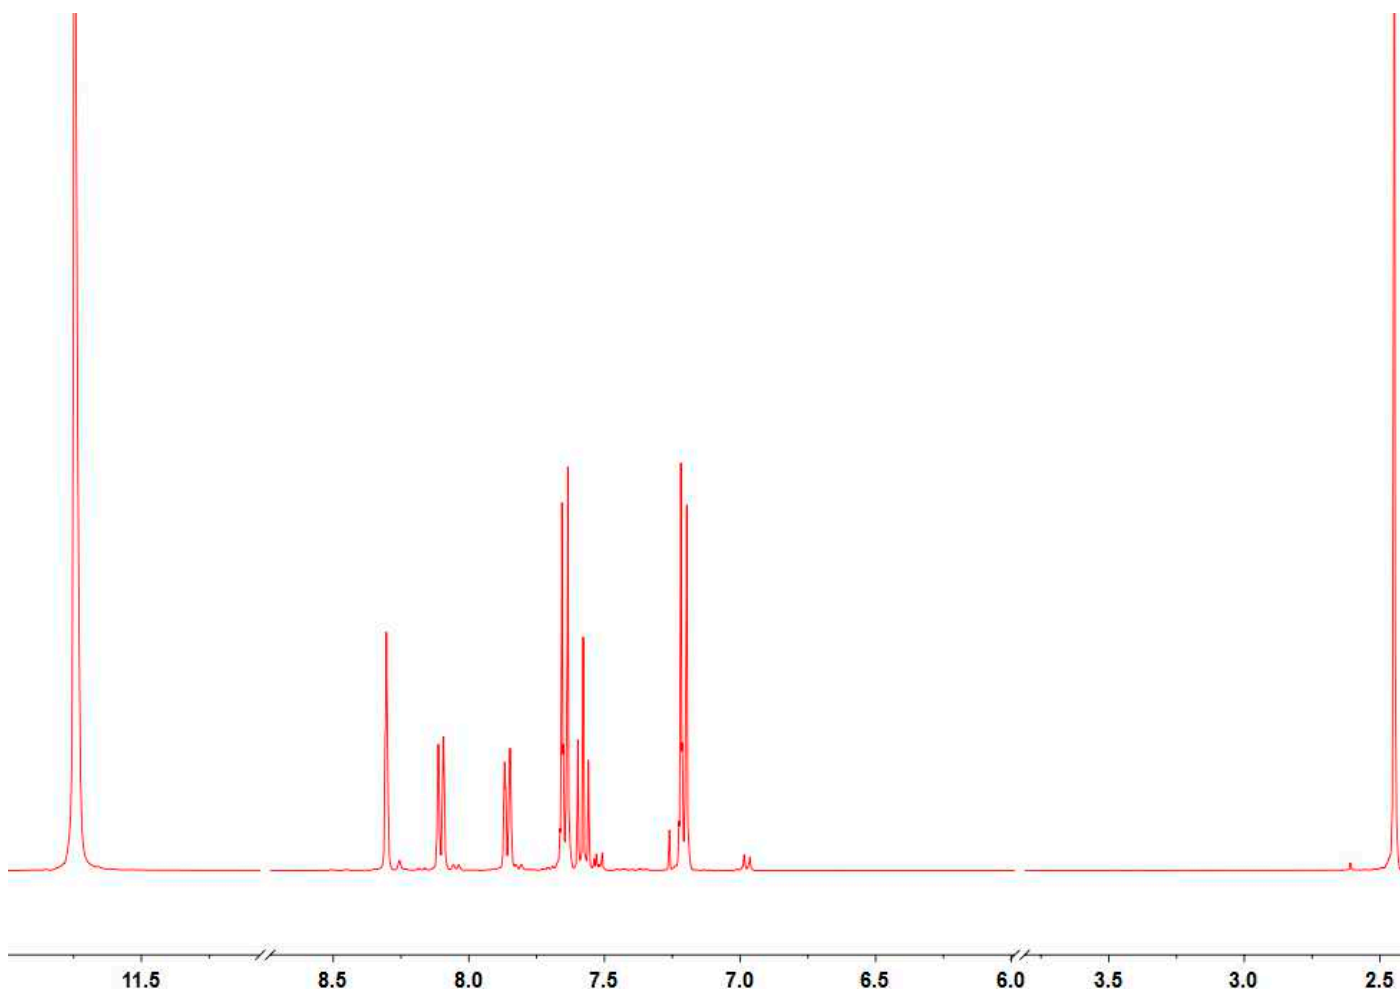

Figure S1. <sup>1</sup>H Spectrum of 3ABCA recorded in a mixture CDCl<sub>3</sub>:CF<sub>3</sub>COOH.

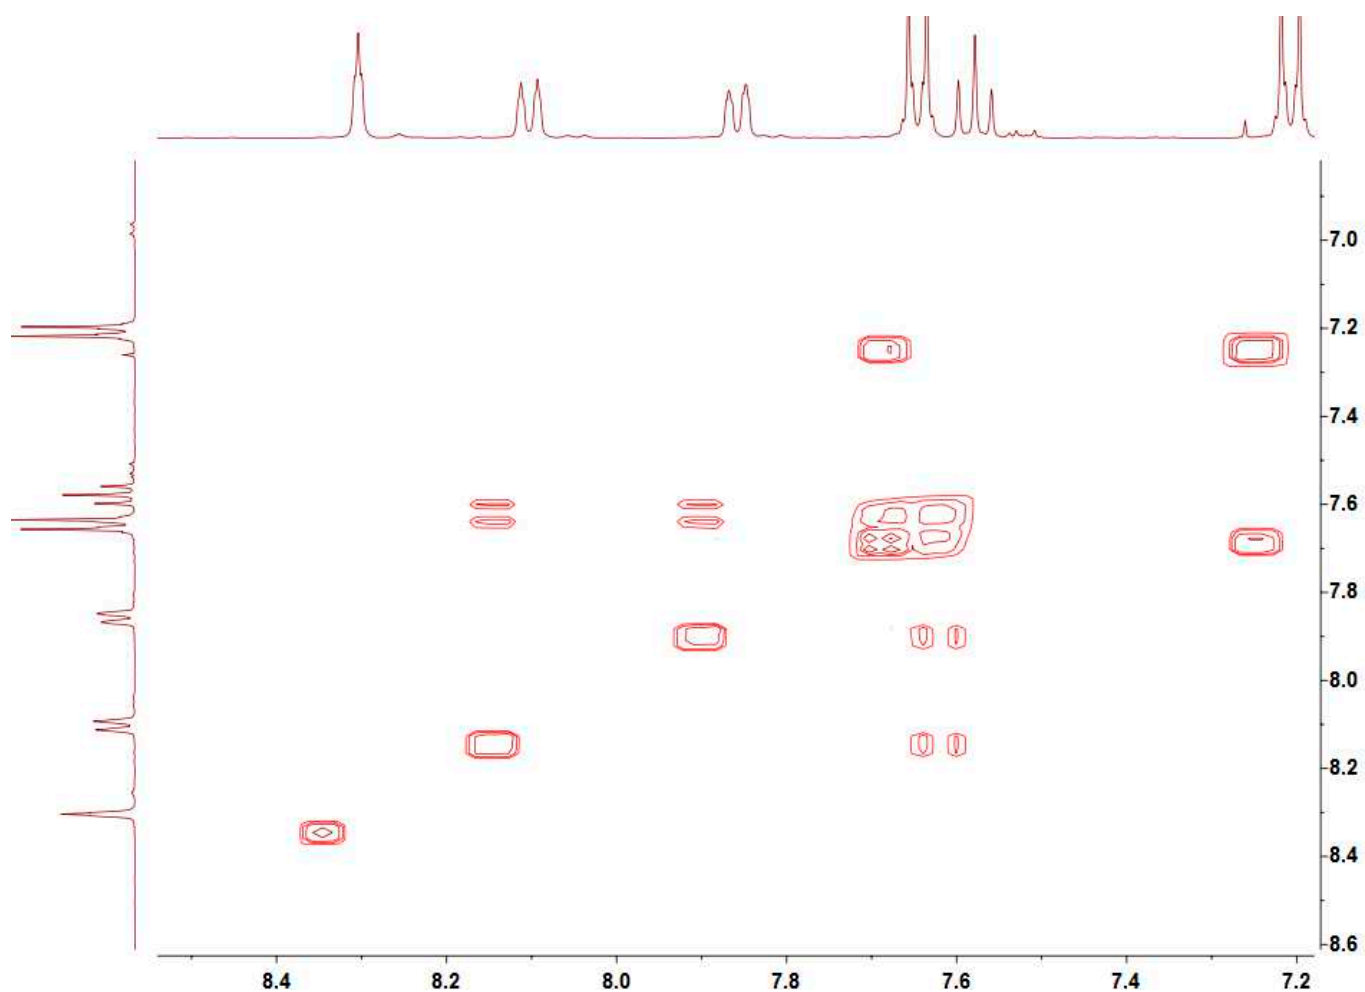

Figure S2. COSY 2D  $^1\text{H}$ - $^1\text{H}$  spectrum of 3ABCA recorded in a mixture  $\text{CDCl}_3$ : $\text{CF}_3\text{COOH}$ .

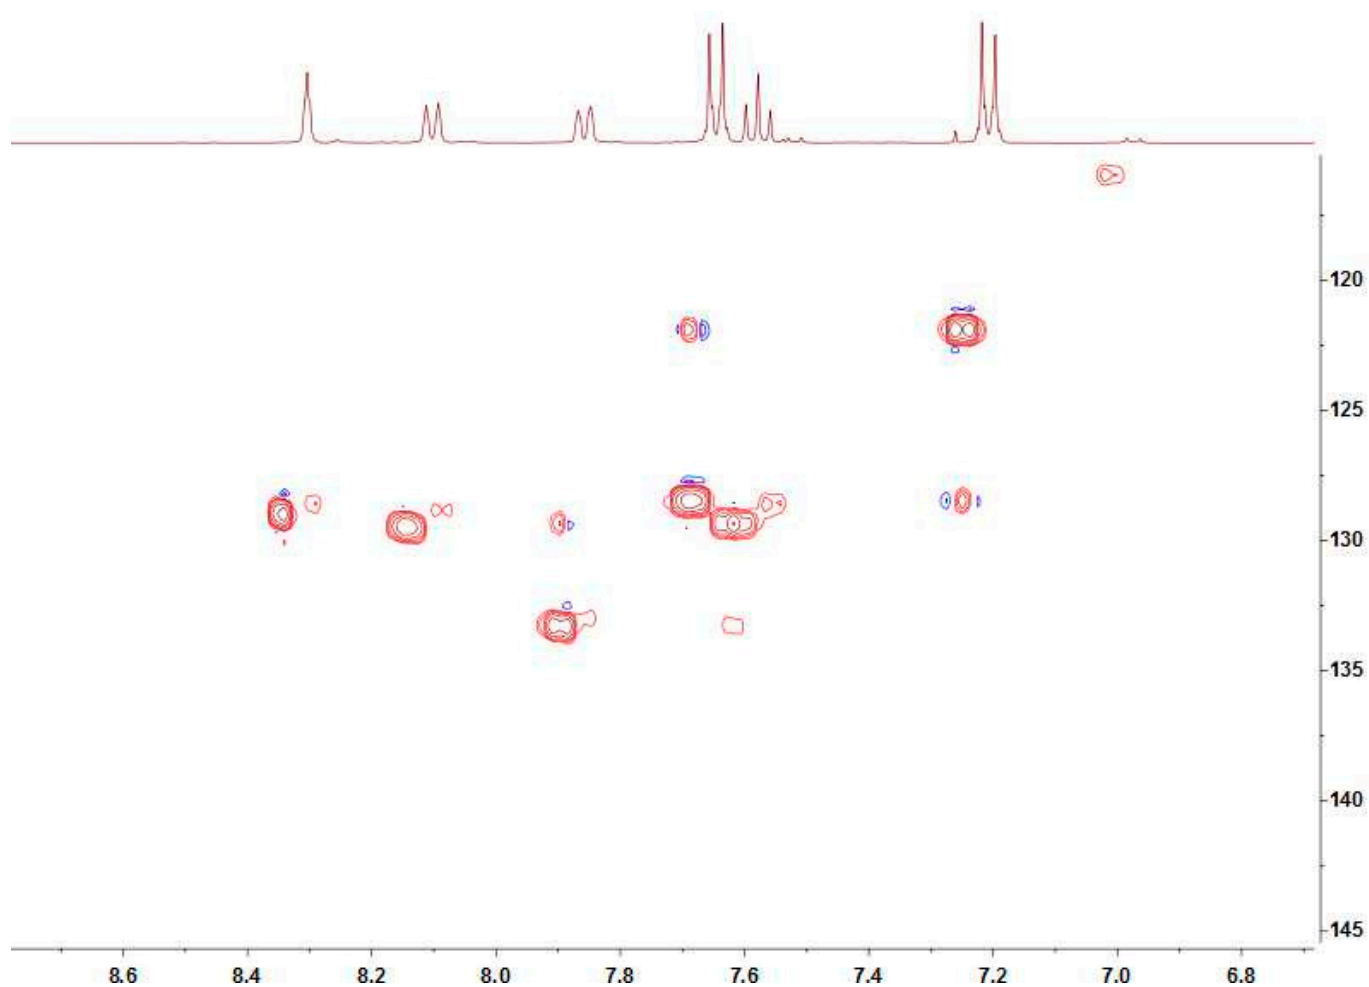

**Figure S3.** HSQC 2D  $^1\text{H}$ - $^{13}\text{C}$  spectrum of 3ABCA recorded in a mixture  $\text{CDCl}_3:\text{CF}_3\text{COOH}$ .

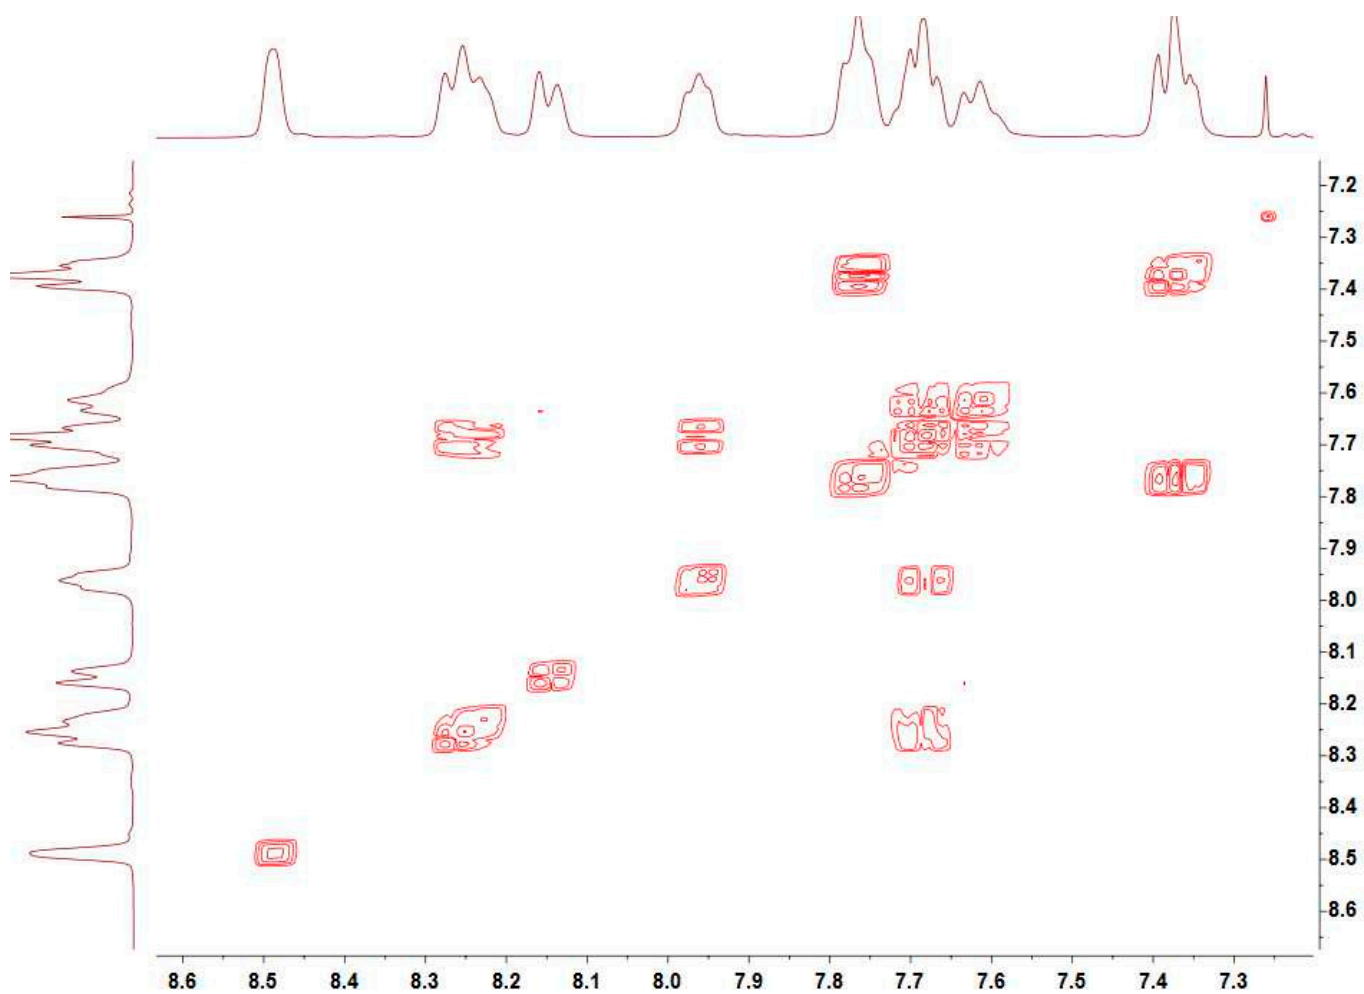

**Figure S4.** COSY 2D  $^1\text{H}$ - $^1\text{H}$  spectrum of BP50 recorded in a mixture  $\text{CDCl}_3:\text{CF}_3\text{COOH}$ .

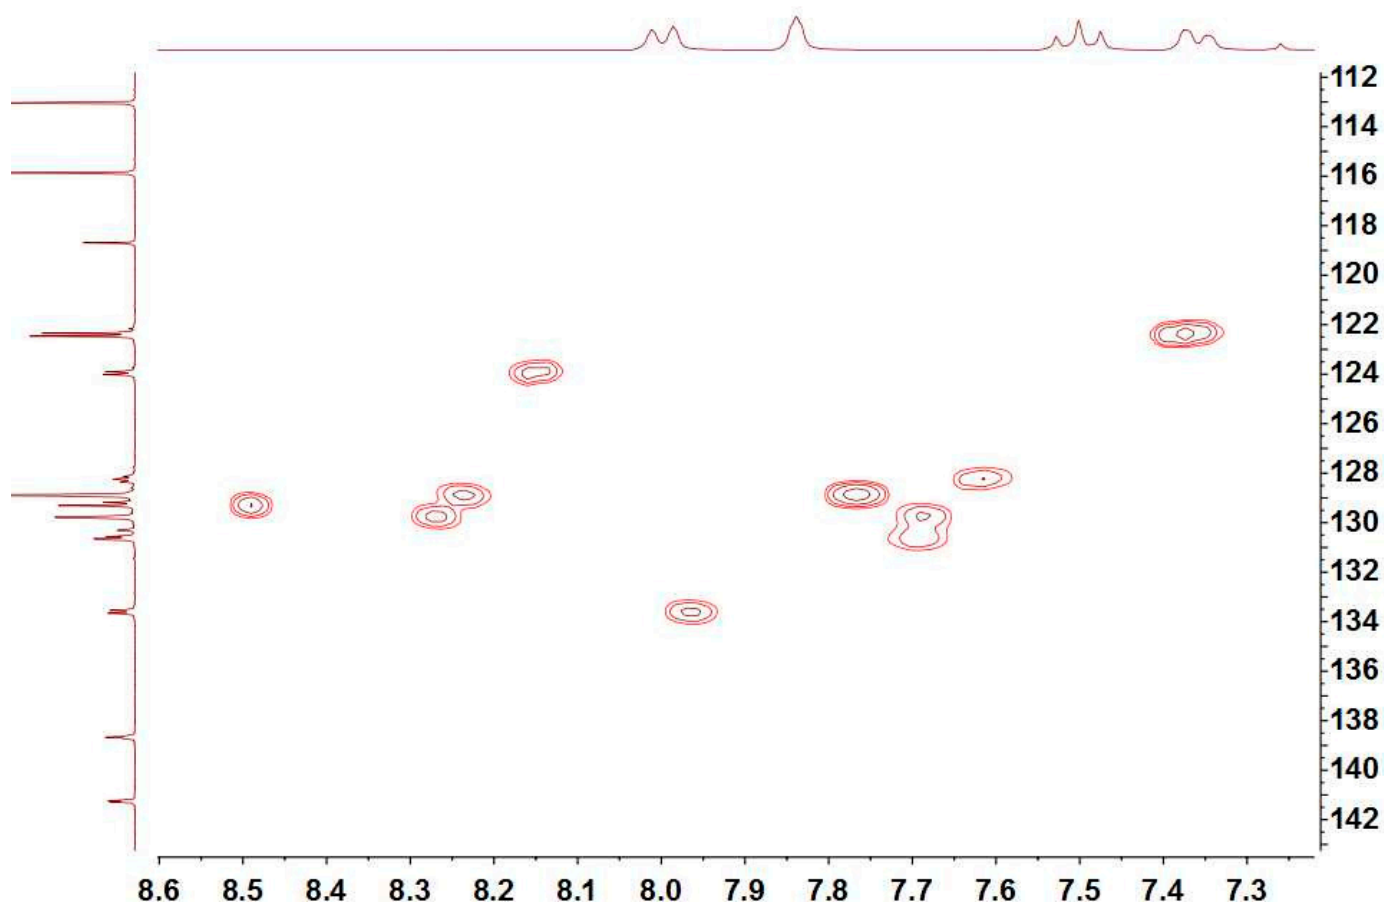

Figure S5. HSQC 2D  $^1\text{H}$ - $^{13}\text{C}$  spectrum of BP50 recorded in a mixture  $\text{CDCl}_3:\text{CF}_3\text{COOH}$ .

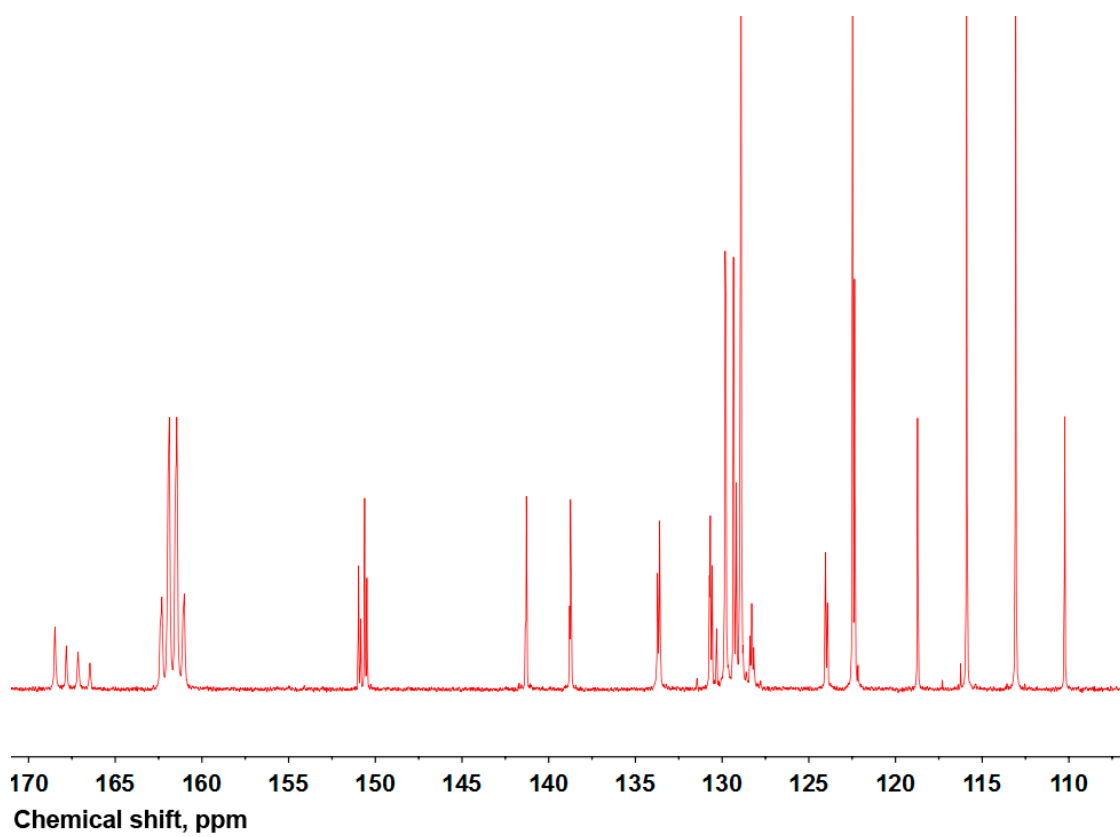

**Figure S6.**  $^{13}\text{C}$  spectrum of BP60 recorded in a mixture  $\text{CDCl}_3:\text{CF}_3\text{COOH}$ .

**Table S1.** Signals in  $^{13}\text{C}$  spectra of BP50 and BP60 copolyesters and their assignment.

| BP50           | BP60           | Assignment                      | Position             |
|----------------|----------------|---------------------------------|----------------------|
| Chemical shift | Chemical shift |                                 |                      |
| 168.31         | 168.42         | 4'3HBCA carbonyl                | 4'3HBCA-4'3HBCA dyad |
| 167.65         | 167.82         | 4'3HBCA carbonyl                | 4'3HBCA-3HBA dyad    |
| 166.99         | 167.15         | 3HBA carbonyl                   | 3HBA-4'3-HBCA dyad   |
| 166.30         | 166.46         | 3HBA carbonyl                   | 3HBA-3HBA dyad       |
| 150.94         | 150.97         | O-Ar (4'3HBCA - 4' and 3HBA -3) |                      |
| 150.81         | 150.83         |                                 |                      |
| 150.60         | 150.62         |                                 |                      |
| 150.47         | 150.48         |                                 |                      |
| 141.29         | 141.34         | Quarternary atoms               |                      |
| 141.24         | 141.28         |                                 |                      |
| 138.72         | 138.80         |                                 |                      |
| 138.67         | 138.74         |                                 |                      |
| 138.62         | 138.69         |                                 |                      |
| 133.66         | 133.72         | 4'3HBCA                         | 4                    |
| 133.54         | 133.60         | 4'3HBCA                         | 4                    |
| 130.68         | 130.73         | 3HBA                            | 6                    |
| 130.64         | 130.68         | 3HBA                            | 6                    |
| 130.56         | 130.58         | 3HBA                            | 6                    |
| 130.30         | 130.32         | 3HBA                            | 6                    |
| 129.80         | 129.83         | 4'3HBCA                         | 2',6                 |
| 129.76         | 129.79         |                                 |                      |
| 129.31         | 129.34         | 4'3HBCA                         | 2                    |
| 129.18         | 129.18         | 3HBA - 2; 4'3HBCA -2',6'        |                      |
| 128.93         | 128.92         |                                 |                      |
| 128.35         | 128.40         | 3HBA                            | 5                    |
| 128.24         | 128.29         | 3HBA                            | 5                    |
| 128.13         | 128.18         | 3HBA                            | 5                    |
| 124.02         | 124.04         | 3HBA                            | 4                    |
| 123.90         | 123.92         | 3HBA                            | 4                    |
| 122.47         | 122.48         | 4'3HBCA                         | 3',5'                |
| 122.35         | 122.36         | 4'3HBCA                         | 3',5'                |
| 118.70         | 118.72         | Quarternary atoms               |                      |
| 115.87         | 115.90         |                                 |                      |
| 113.04         | 113.07         |                                 |                      |
| 110.21         | 110.24         |                                 |                      |
